# Supplementary material for: Dissection of context-dependent RNA colocalization landscapes from subcellular spatial transcriptomics data
Source: Research Square preprint supplement (doi:10.21203/rs.3.rs-7463836/v1), 2025-10-17
Supplement: Supplementary file 1 [file 451684726be454dcdd4df42c.docx]

**Table S1. RNA colocalization networks reconstructed by SCRIN from spatial transcriptome datasets.**

| **ST Method** | **Tissue** | **Species** | **Data subset** | **Genes** | **Cells** | **Transcripts** | **Detection method** | **R (µm)*** | **Pairs‡** | **Suppl. File** | **Ref** |
| --- | --- | --- | --- | --- | --- | --- | --- | --- | --- | --- | --- |
| **MERFISH** | Primary motor cortex | Mus musculus | Slice31 | 258 | 2,954 | 917,012 | Radius | 0.5 | 103 | NWK 1 | 1 |
| Sample1 | 17,627 | 4,885,769 | 210 | NWK 2 |
| Sample4 (cell sampled) | 10,000 | 3,572,374 | 263 | NWK 3 |
| Sample5 (cell sampled) | 10,000 | 3,657,598 | 316 | NWK 4 |
| Mouse1 | 155,307 | 51,402,566 | 600 | NWK 5 |
| **Stereo-seq** | Brain | Mus musculus | E9.5, E1S1 brain | whole transcriptome | N/A | 21,774,397 | Grid | ~1 | 777 | NWK 29 | 2 |
| E10.5, E1S1 brain | N/A | 34,151,233 | 17,072 | NWK 40 |
| E11.5, E1S1 brain | N/A | 69,158,219 | 73,466 | NWK 53 |
| E12.5, E1S1 brain | N/A | 95,251,667 | 42,298 | NWK 72 |
| E13.5, E1S1 brain | N/A | 92,151,571 | 9,997 | NWK 94 |
| E14.5, E1S1 brain | N/A | 144,066,246 | 34,191 | NWK 114 |
| E15.5, E1S1 brain | N/A | 77,335,804 | 3,641 | NWK 140 |
| E16.5, E1S1 brain | N/A | 103,774,552 | 42,168 | NWK 165 |
| E16.5, E1S3 brain | 69,447 | 73,877,494 | 15,368 | NWK 186 |
| Adult brain | 56,731 | 97,784,537 | 117,931 | NWK 187 |
| **Stereo-seq** | Embryonic tissues | Mus musculus | 43 tissue types | whole transcriptome | N/A | Suppl. File NWK28-185 | Grid | ~1 | Suppl. File NWK 28-185 | NWK 28-185 | 2 |
| **PIXEL-seq** | Parabrachial nucleus | Mus musculus | PainPBN, Sham, rep1 | whole transcriptome | N/A | 31,470,889 | Radius | 1.5 | 11,303 | NWK 6 | 3 |
| PainPBN, SNL, rep1 | N/A | 23,144,632 | 8,392 | NWK 7 |
| **CosMX** | Brain | Mus musculus | Overall data | 1,000 | 48,549 | 74,981,305 | Radius | 0.5 | 6,905 | NWK 8 | 4,5 |
| Lymph node | Homo sapiens | Plasma cell | 6,175 | 30,018 | 30,706,864 | 2,942 | NWK 27 |
| Lymph node | Homo sapiens | Overall data | 6,175 | 1,852,946 | 1,381,937,582 | 94,846 | NWK 9 |
| Pancreas | Homo sapiens | Overall data | 18,946 | 47,270 | 60,185,075 | 9,395 | NWK 10 |
| **Colocalization radius, genes located within this distance are identified as neighbors. ‡The number of colocalized pairs with q-value below 1×10-5.* | | | | | | | | | | | |

**Table S2. Cell-specific RNA colocalization networks from the lymph node dataset.**

| **Dataset** | **Cell type** | **Cells** | **Transcripts** | **Pairs‡** | **Suppl. File** | **R (µm)*** |
| --- | --- | --- | --- | --- | --- | --- |
| **CosMX**  **Lymph node**  **Homo sapiens**  **6175 genes** | APC | 35,454 | 35,017,434 | 2,546 | NWK 13 | 0.5 |
| B cell 1 | 280,714 | 197,207,925 | 12,261 | NWK 14 |
| B cell 2 | 239,712 | 188,439,086 | 13,584 | NWK 15 |
| B cell 3 | 183,914 | 156,379,793 | 13,135 | NWK 16 |
| CD4 T cell | 238,906 | 169,381,404 | 11,429 | NWK 17 |
| CD8 T cell | 40,889 | 32,639,075 | 1,981 | NWK 18 |
| epithelial cell | 9,060 | 8,604,354 | 551 | NWK 19 |
| fibroblast reticular cell 1 | 131,352 | 115,994,225 | 11,355 | NWK 20 |
| fibroblast reticular cell 2 | 93,335 | 86,548,442 | 6,351 | NWK 21 |
| GC B cell | 57,165 | 68,735,213 | 5,228 | NWK 22 |
| interferon-stimulated cell | 37,415 | 27,028,754 | 1,025 | NWK 23 |
| macrophage | 90,253 | 85,384,021 | 7,347 | NWK 24 |
| NK cell | 25,016 | 22,753,154 | 1,617 | NWK 25 |
| pericyte | 60,624 | 58,158,434 | 3,924 | NWK 26 |
| plasma cell | 30,018 | 30,706,864 | 2,942 | NWK 27 |
| **Colocalization radius, genes located within this distance are identified as neighbors. ‡The number of colocalized pairs with q-value below 1×10-5.* | | | | | | |

# References

1 Zhang, M. *et al.* Spatially resolved cell atlas of the mouse primary motor cortex by MERFISH. *Nature* **598**, 137-143 (2021). <https://doi.org/10.1038/s41586-021-03705-x>

2 Chen, A. *et al.* Spatiotemporal transcriptomic atlas of mouse organogenesis using DNA nanoball-patterned arrays. *Cell* **185**, 1777-1792.e1721 (2022). <https://doi.org/https://doi.org/10.1016/j.cell.2022.04.003>

3 Fu, X. *et al.* Polony gels enable amplifiable DNA stamping and spatial transcriptomics of chronic pain. *Cell* **185**, 4621-4633.e4617 (2022). <https://doi.org/https://doi.org/10.1016/j.cell.2022.10.021>

4 He, S. *et al.* High-plex Multiomic Analysis in FFPE at Subcellular Level by Spatial Molecular Imaging. *bioRxiv*, 2021.2011.2003.467020 (2022). <https://doi.org/10.1101/2021.11.03.467020>

5 Khafizov, R. *et al.* Sub-cellular Imaging of the Entire Protein-Coding Human Transcriptome (18933-plex) on FFPE Tissue Using Spatial Molecular Imaging. *bioRxiv*, 2024.2011.2027.625536 (2024). <https://doi.org/10.1101/2024.11.27.625536>
