# Supplementary material for: Dissection of context-dependent RNA colocalization landscapes from subcellular spatial transcriptomics data
Source: Research Square preprint supplement (doi:10.21203/rs.3.rs-7463836/v1), 2025-10-17
Supplement: Supplementary file 2 [file 9cb0fb0448062e1082f74f09.docx]

## Supplementary Figures S1-S5

Dissection of context-dependent RNA colocalization landscapes from subcellular spatial transcriptomics data

Xu Chen1,2, Runze Li1,2, Yuanyuan Zeng1, Xuerui Yang1*

1 MOE Key Laboratory of Bioinformatics, Center for Synthetic & Systems Biology, School of Life Sciences, Tsinghua University, Beijing, China

2 These authors contributed equally to this work

*Correspondence: Xuerui Yang, School of Life Sciences, Tsinghua University, Beijing 100084, China. Email: yangxuerui@tsinghua.edu.cn


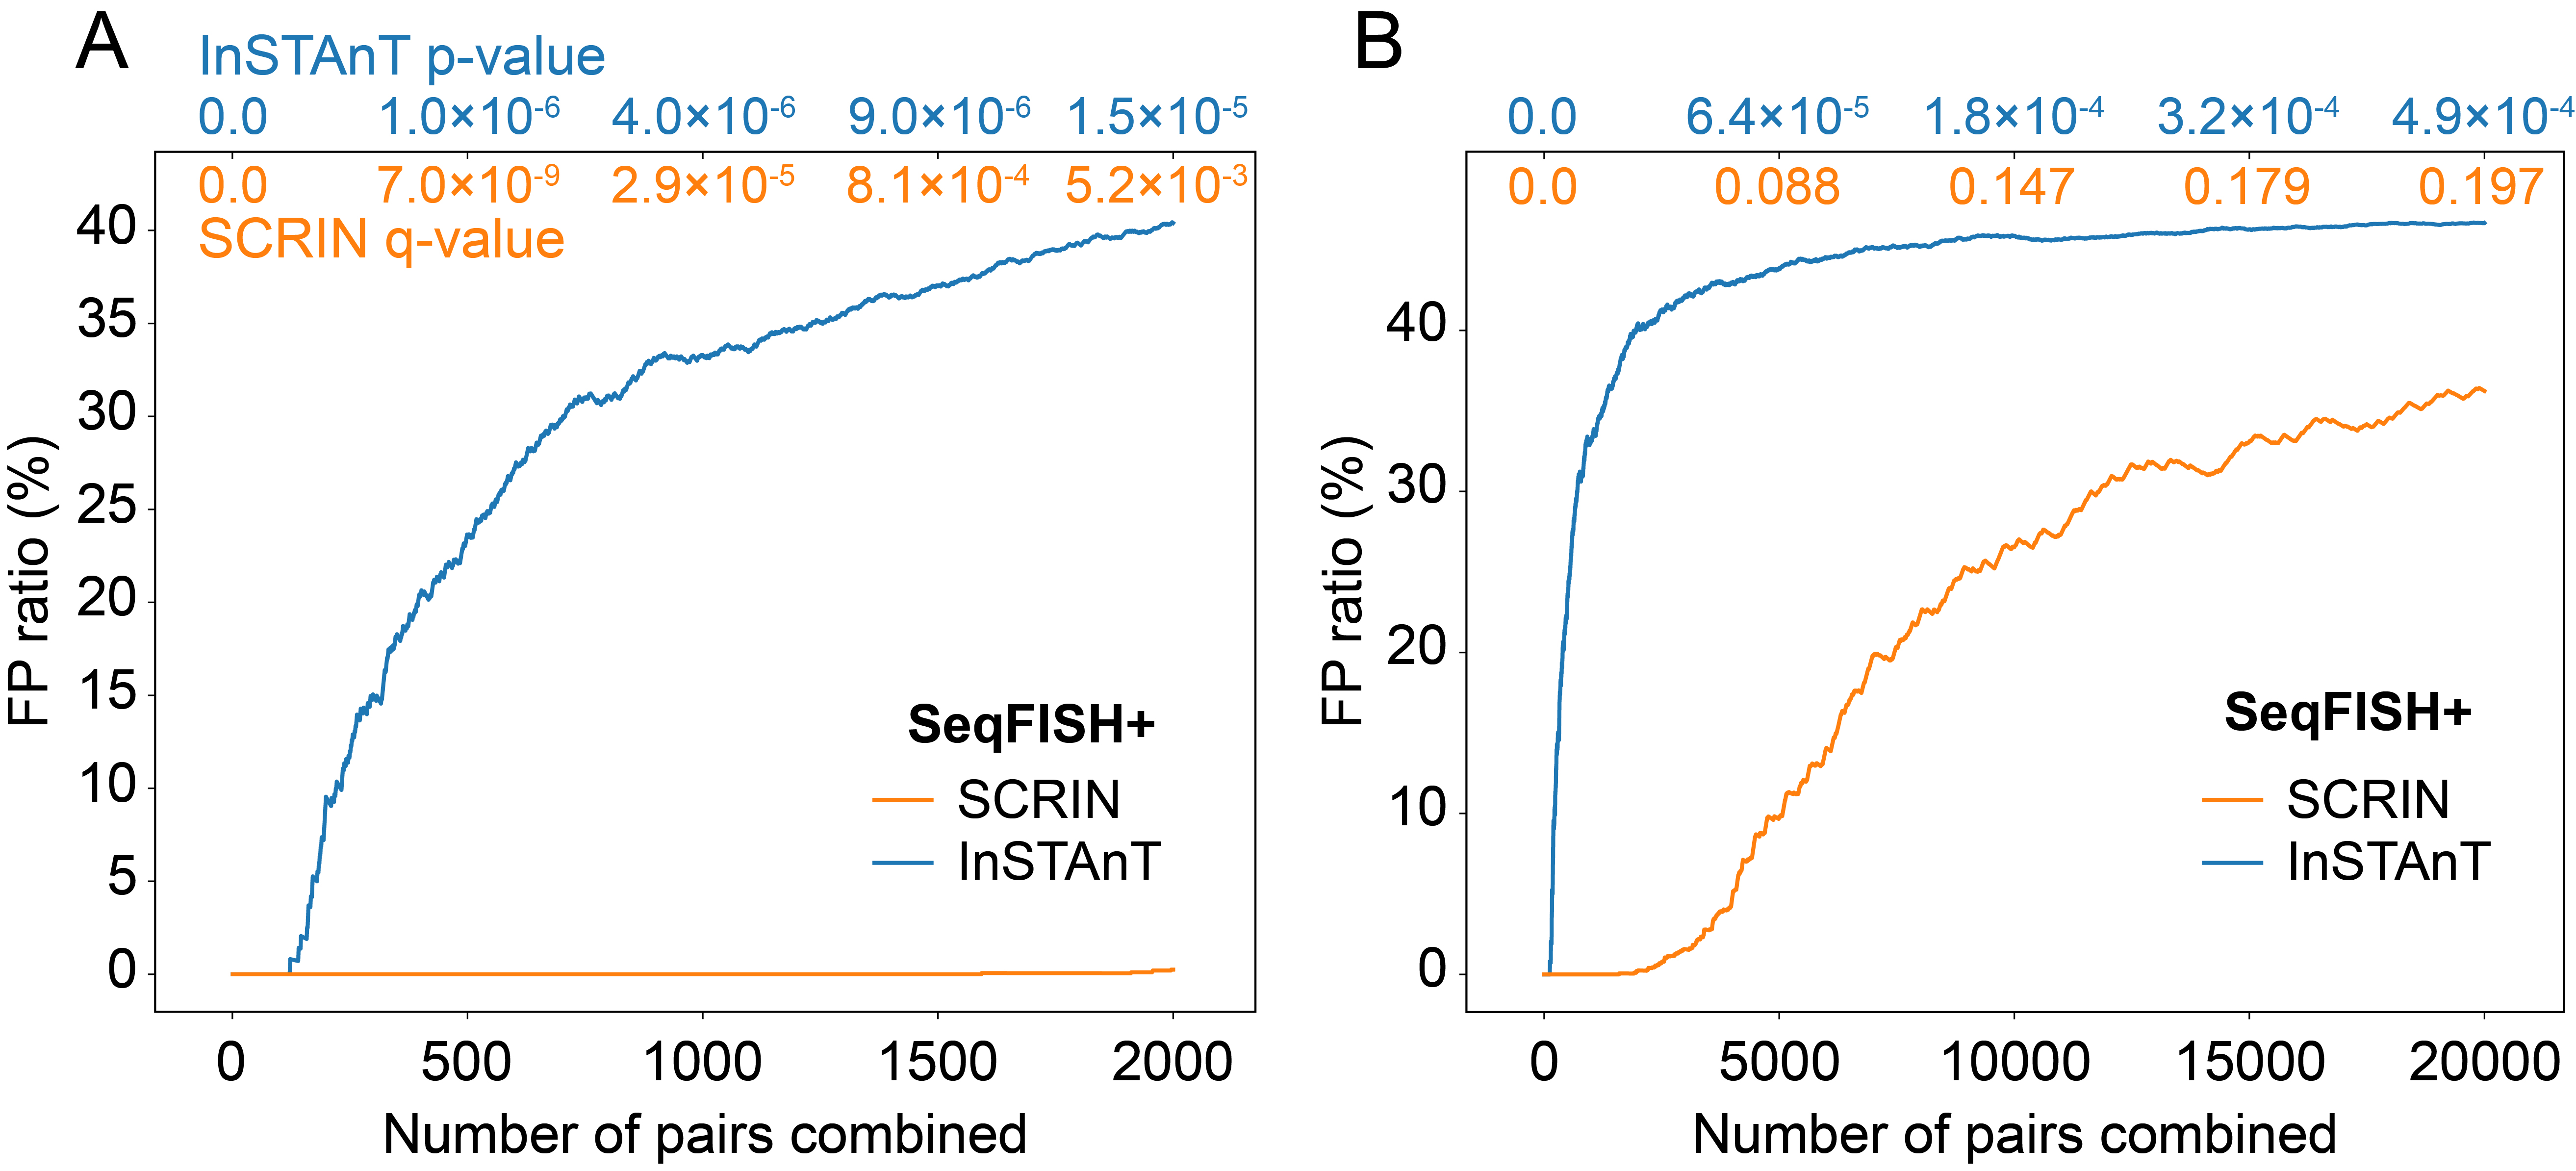


**Figure S1. Comparison of false positive rates by SCRIN and InSTAnT.**

**(A)** False positive rates (FPRs) of the top 2000 combined pairs calculated using the NIH/3T3 fibroblast SeqFISH+ dataset. Permuted datasets were generated by shuffling gene labels within each cell. Real and permuted results were combined and ranked by significance (q-value for SCRIN; p-value for InSTAnT). FPR at each rank cutoff was defined as the fraction of top-ranked pairs originating from the permuted data.

**(B)** FPRs of the top 20,000 combined pairs calculated using the same dataset and methods as in (A).


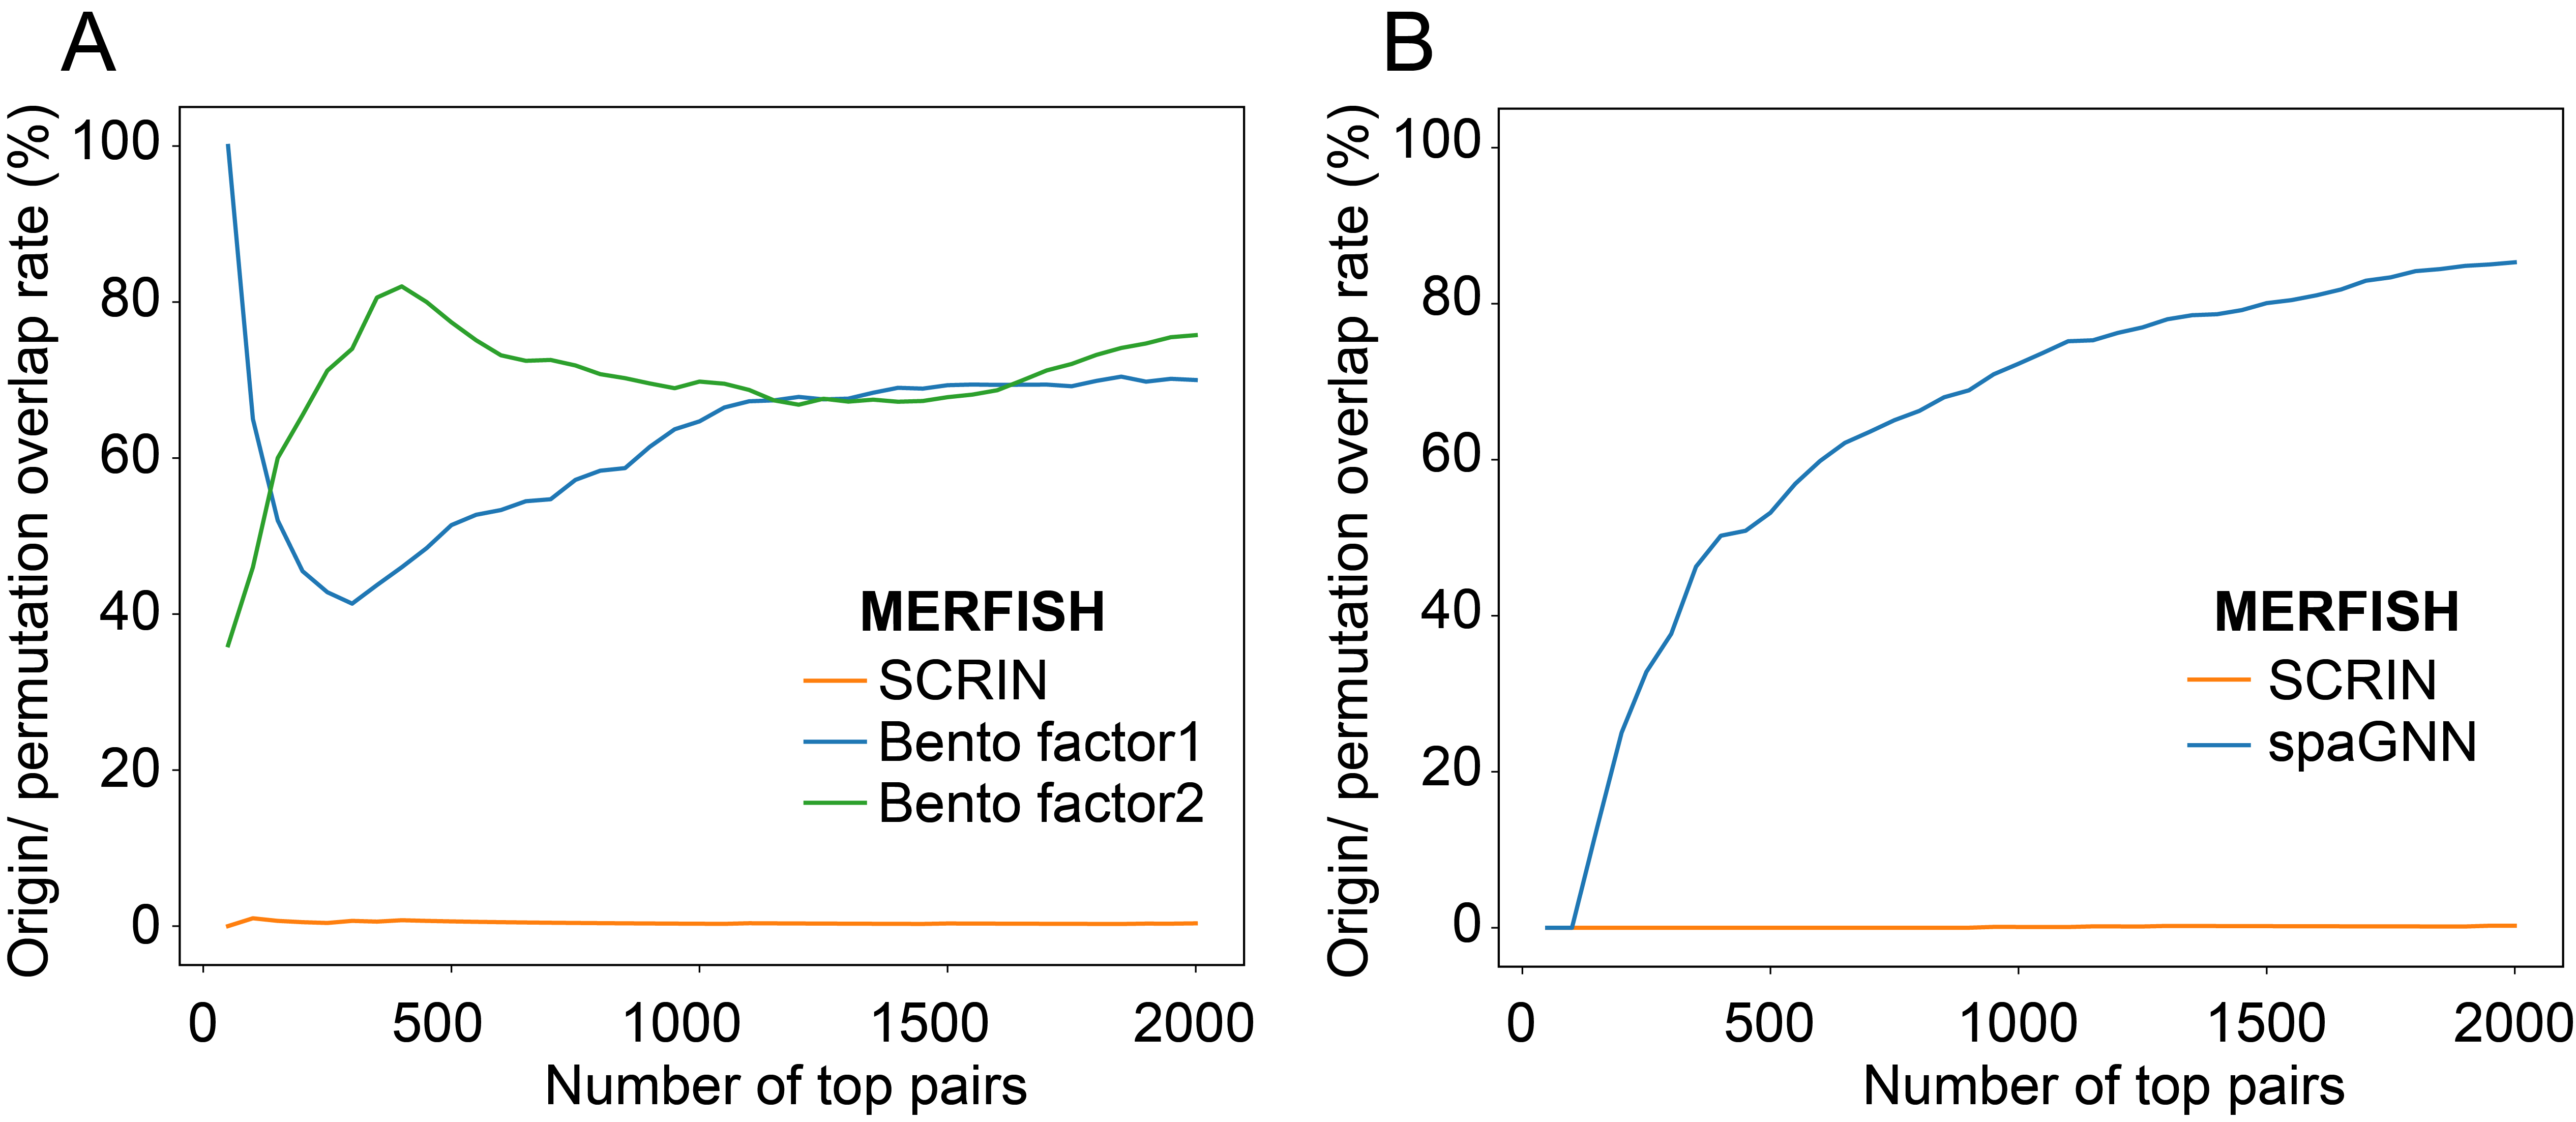


**Figure S2. Overlapping rates of top-ranked pairs from original and permuted datasets.**

**(A, B)** Overlap rates for the MERFISH U2-OS dataset. Bento results include colocalized gene pairs derived from two distinct tensor decomposition factors. The overlap rate was defined as the proportion of shared gene pairs among the top N ranked pairs from real versus permuted datasets.


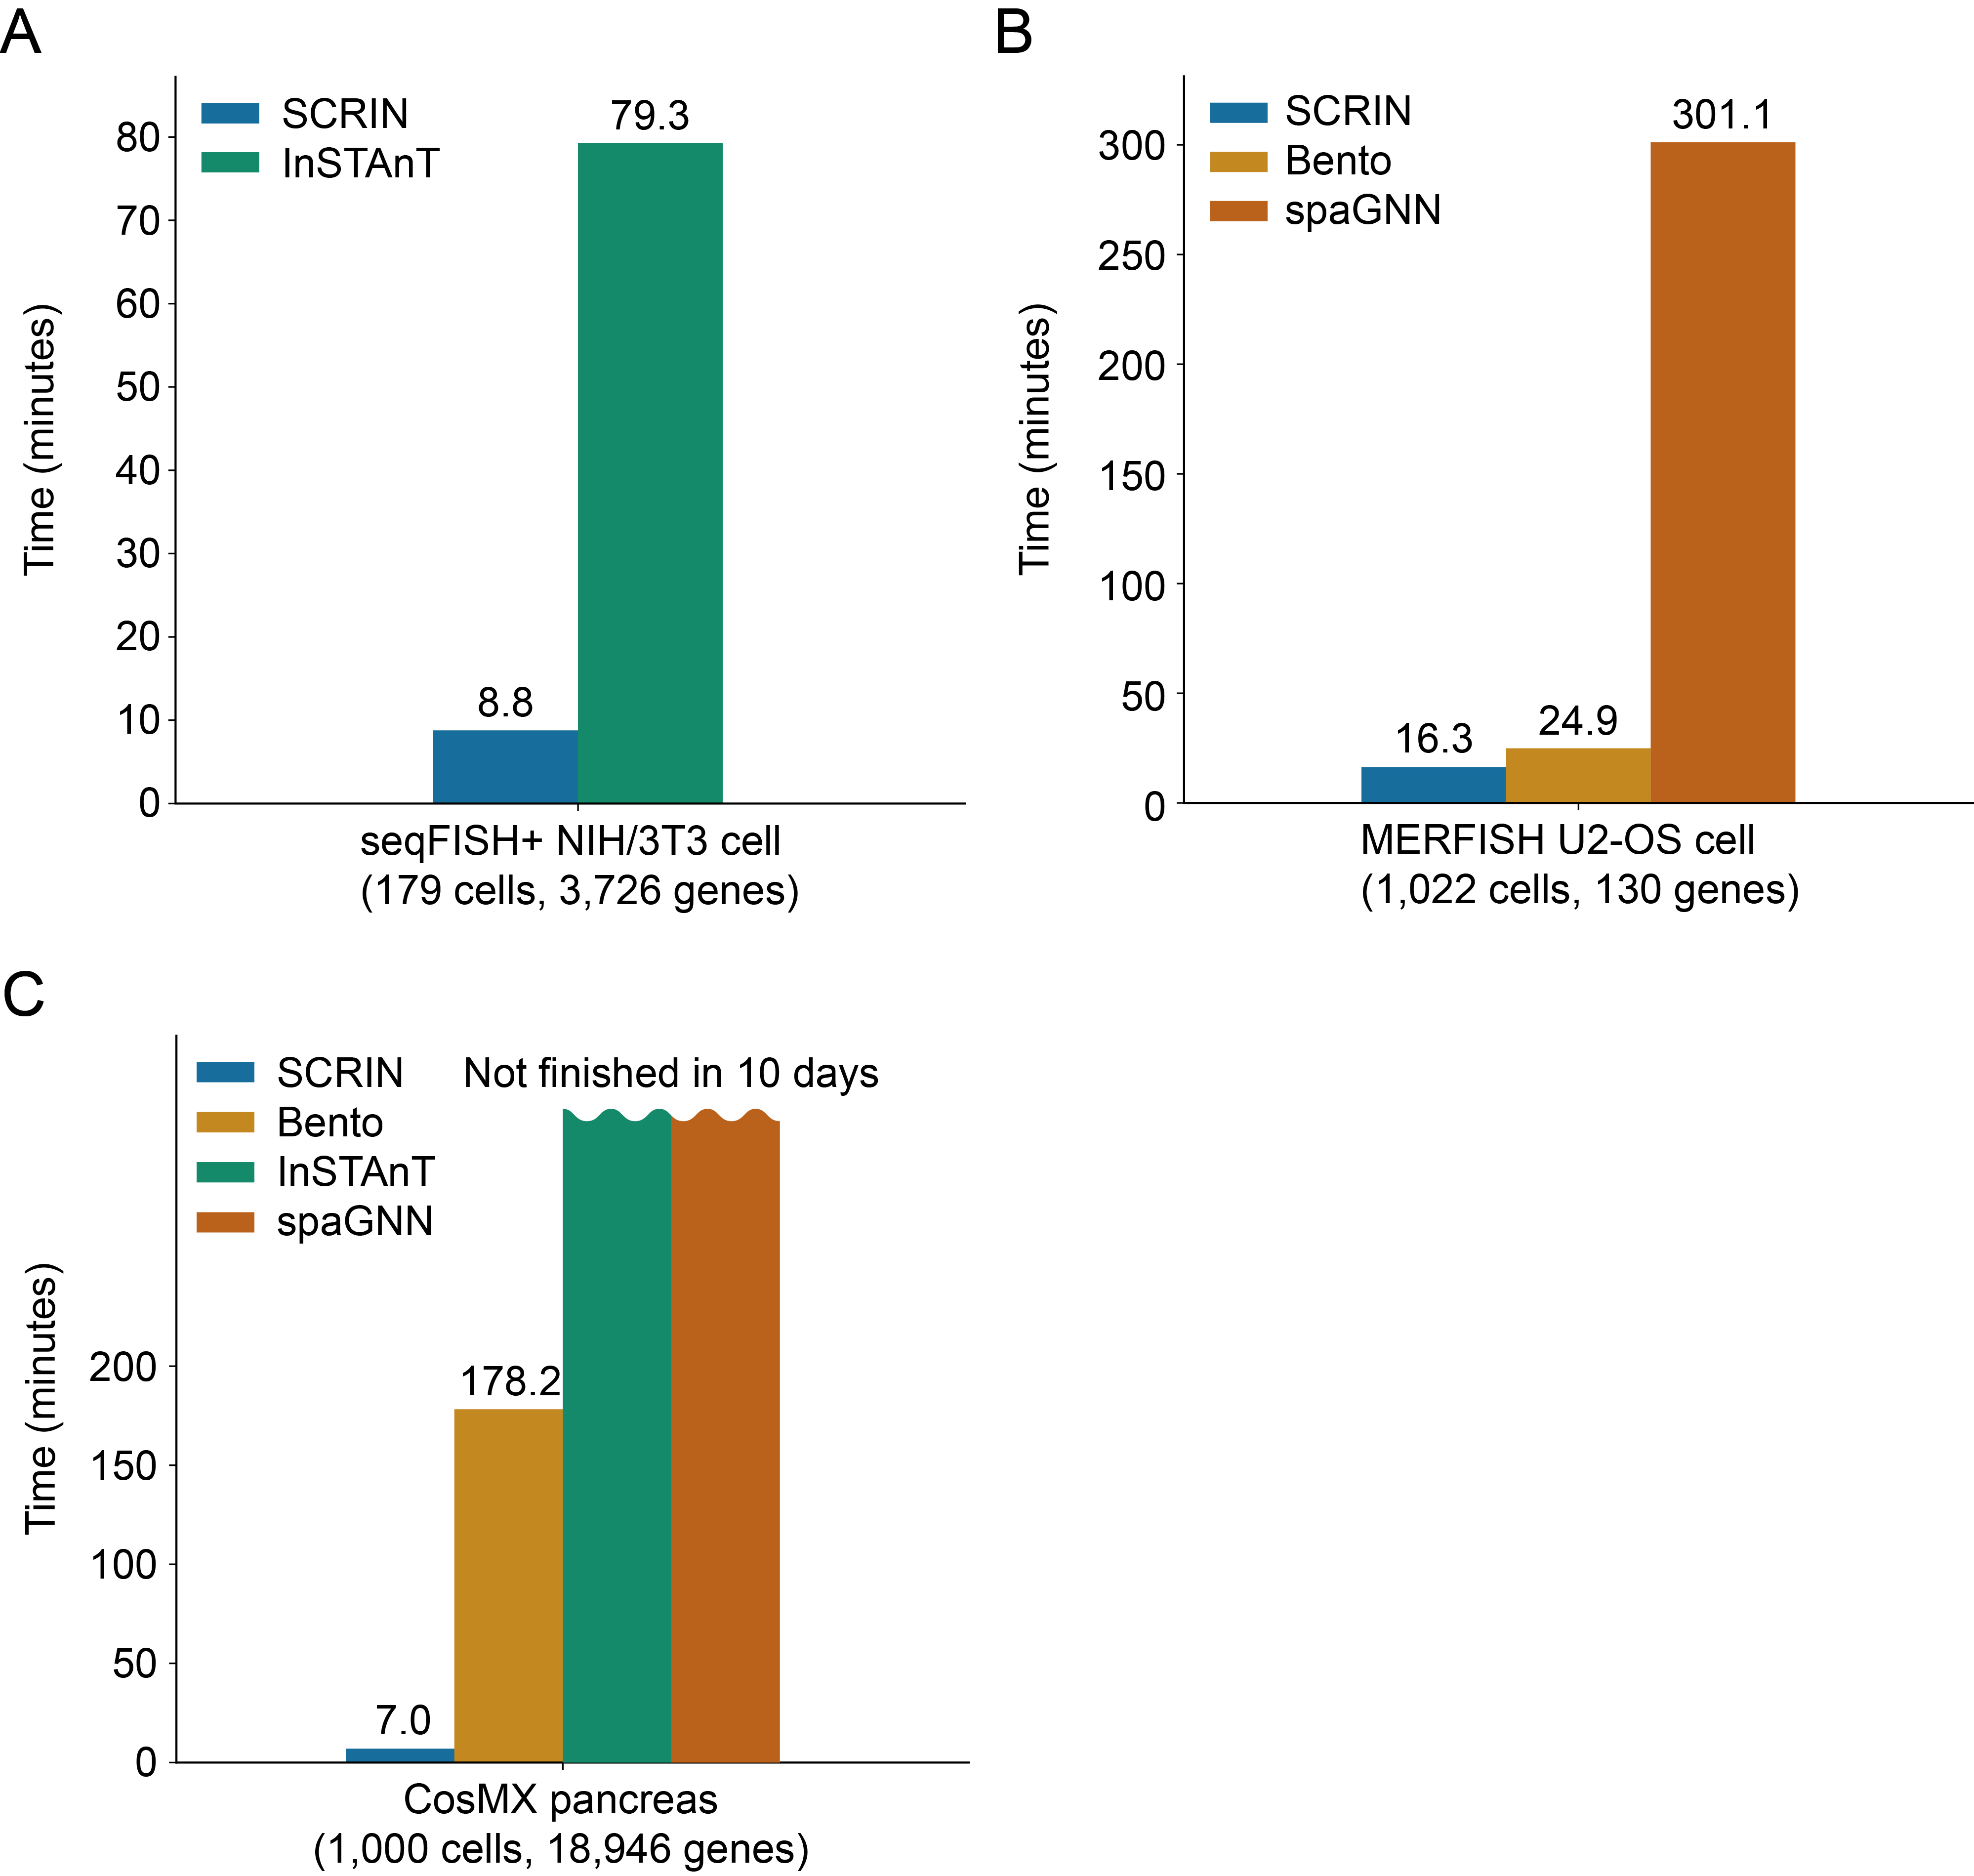


**Figure S3. Computational costs of different methods across multiple spatial transcriptomics datasets.**

**(A)** Runtime comparison between SCRIN and InSTAnT using the SeqFISH+ NIH/3T3 dataset.

**(B)** Runtime comparison between SCRIN, Bento, and spaGNN using the MERFISH U2-OS dataset.

**(C)** Runtime benchmarking of SCRIN, Bento, InSTAnT, and spaGNN on the CosMX pancreas dataset (1000 sampled cells, 18946 genes).


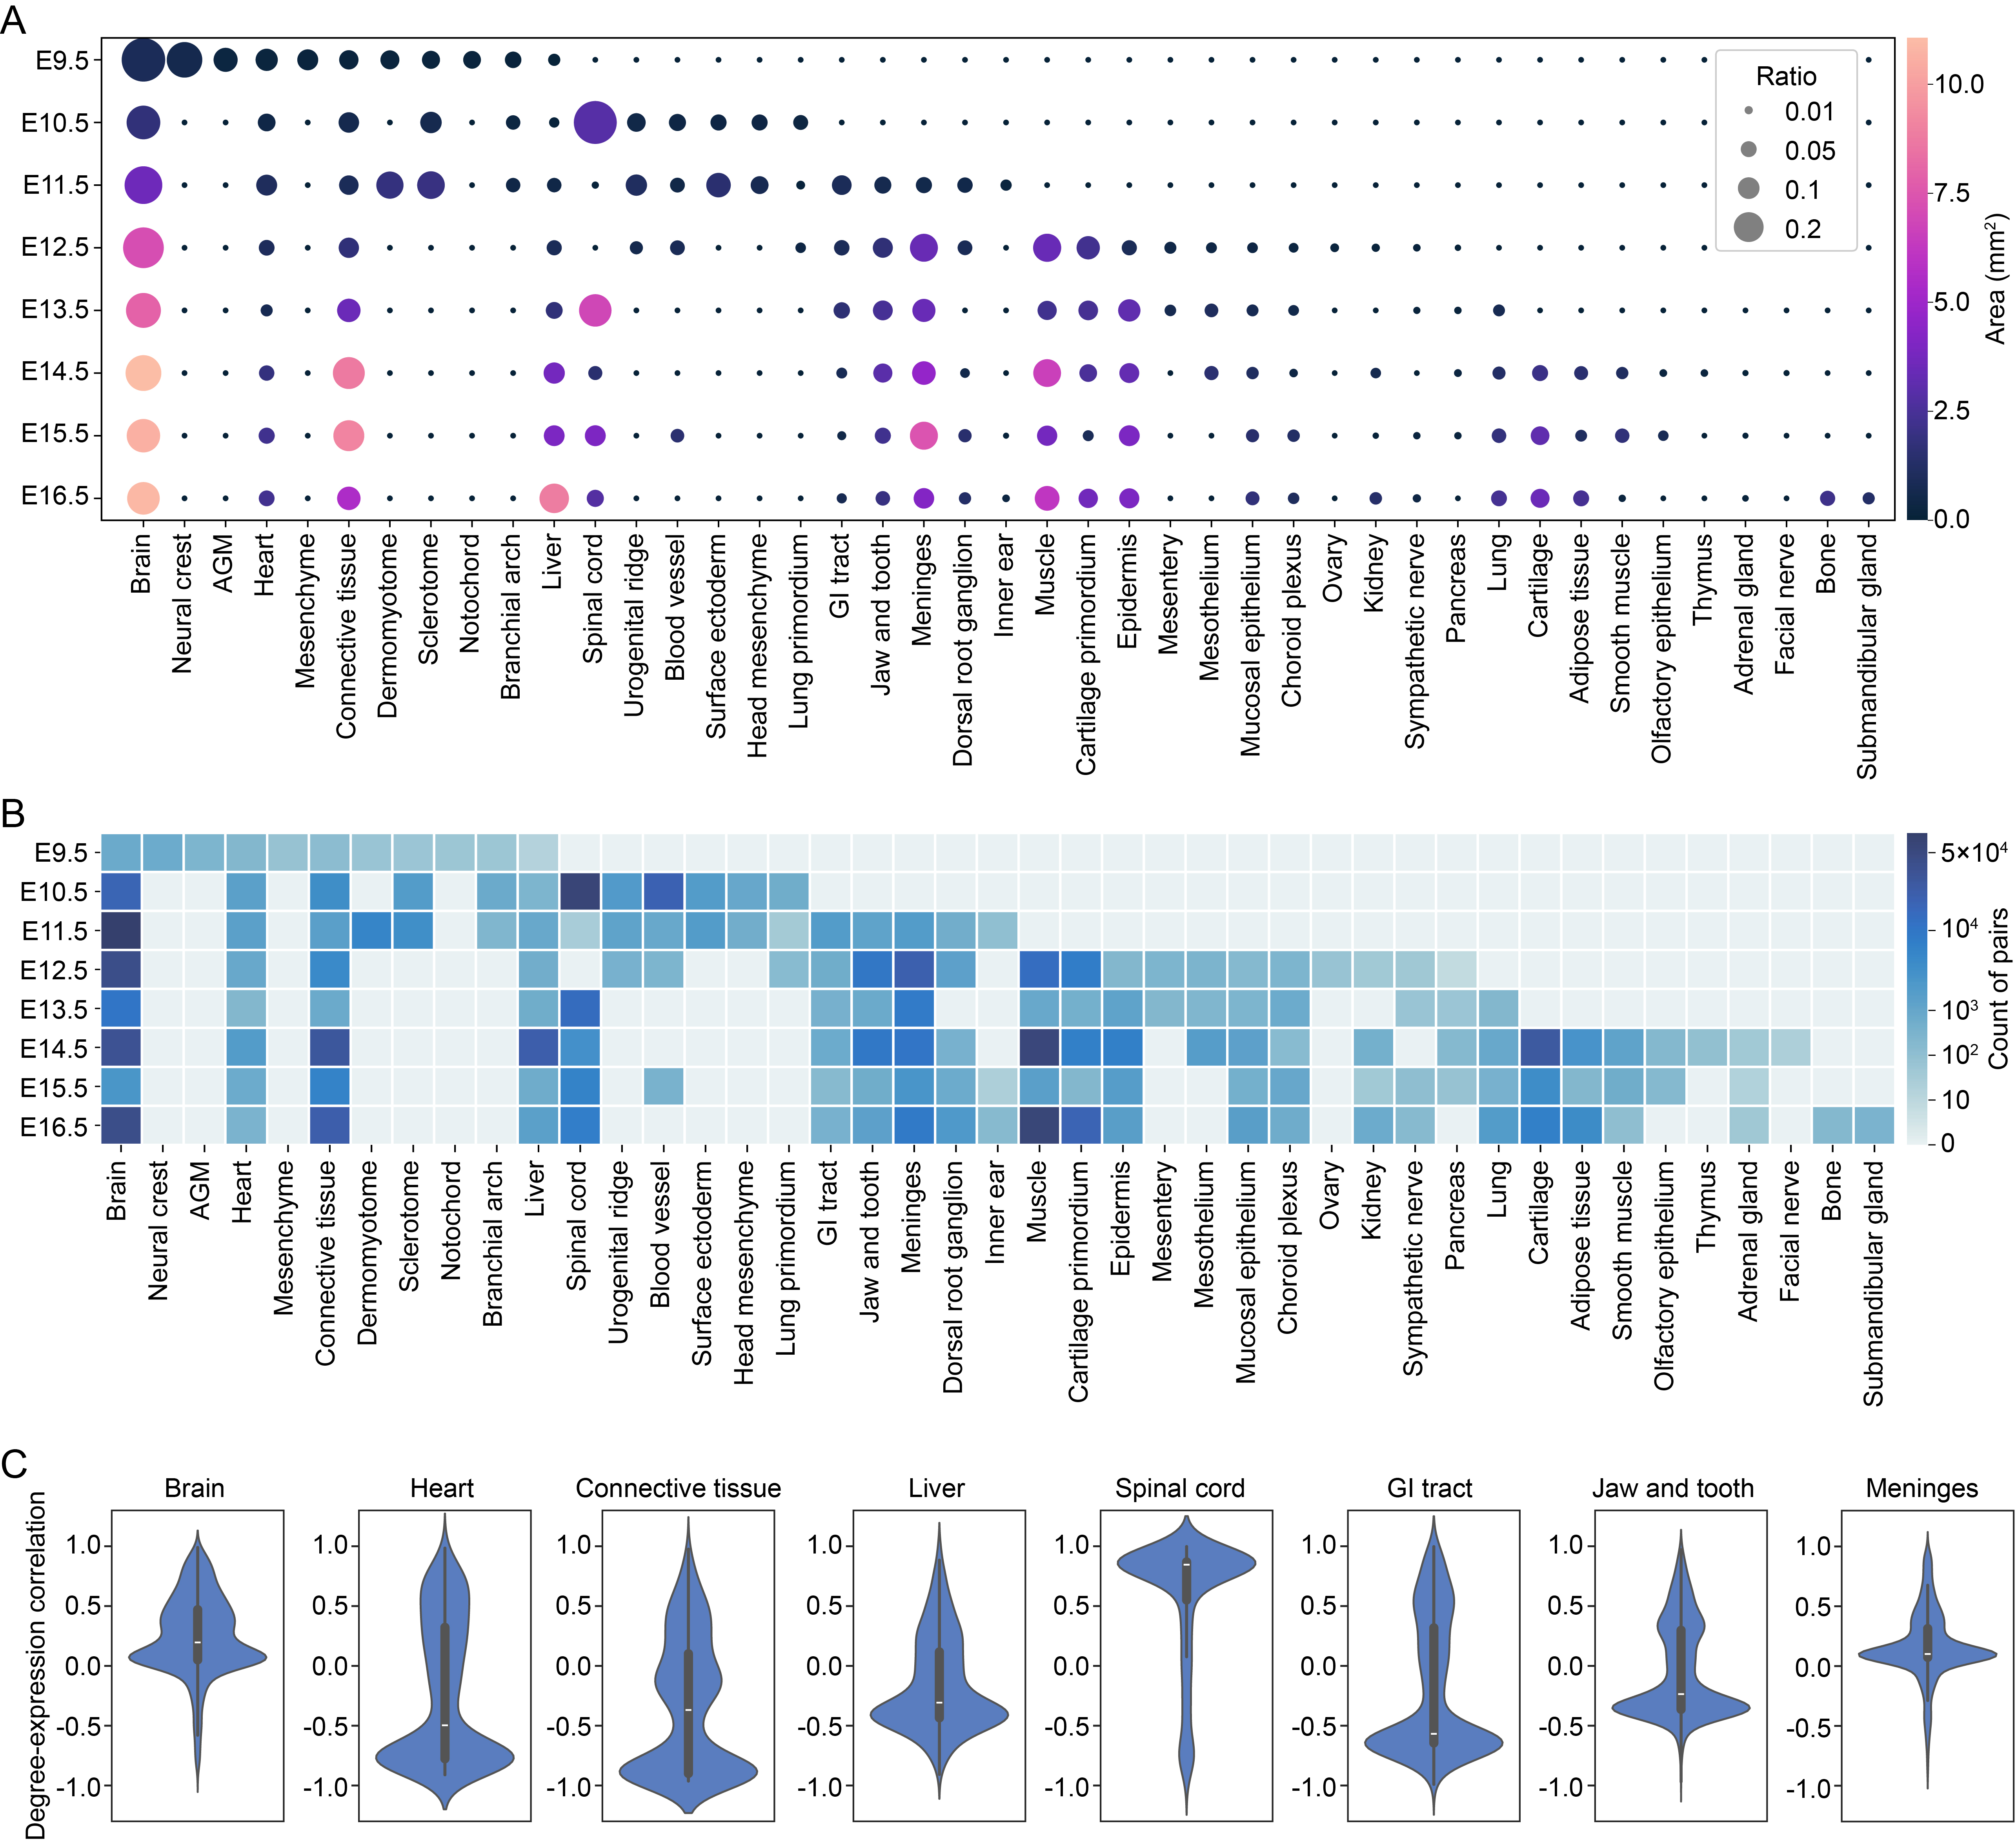


**Figure S4. Analysis of RNA colocalization networks during mouse embryonic tissue development.**

**(A)** Bubble plot shows tissue area composition across eight embryonic stages (E9.5-E16.5) on the Stereo-seq dataset. Bubble size represents relative area proportion within each stage, and bubble color indicates absolute tissue area.

**(B)** Heatmap showing the number of SCRIN-detected colocalized gene pairs per tissue across eight embryonic stages (E9.5-E16.5; Stereo-seq dataset).

**(C)** Distribution of Pearson correlation coefficients between gene expression and colocalization degree. Correlations were calculated using stage-matched expression and degree values for genes maintaining degree ≥1 across all stages. Only tissues present in ≥6 stages were included.


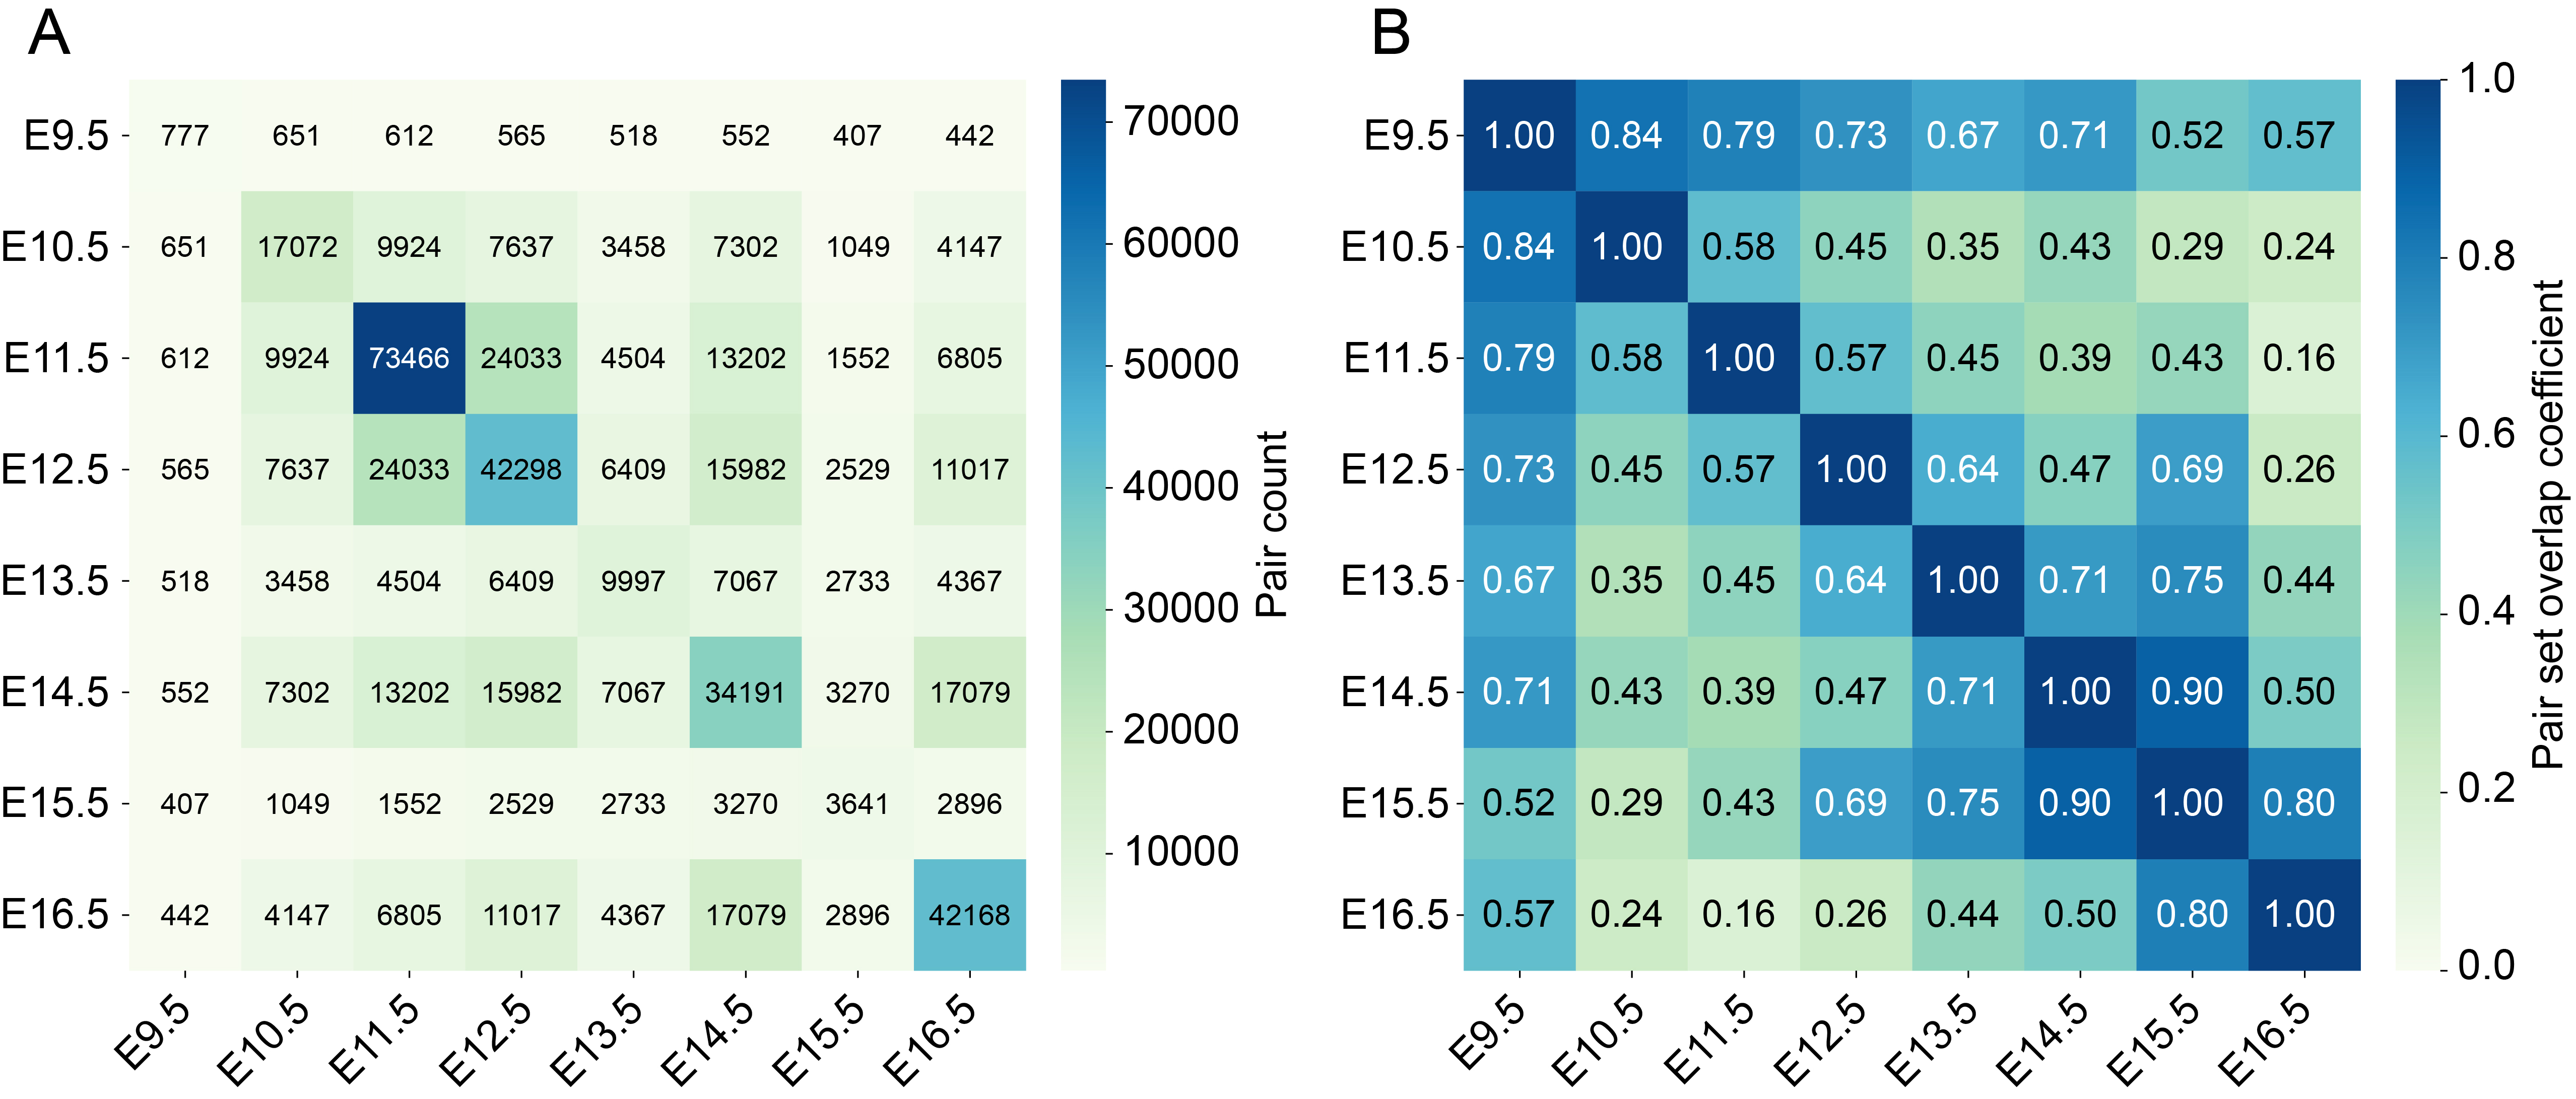


**Figure S5. Stage-wise overlap of RNA colocalization patterns during mouse embryonic brain development.**

**(A)** Counts of overlap colocalized gene pairs between all eight developmental stages.

**(B)** Overlap coefficients of colocalized gene pairs between eight stages.
